# Supplementary material
Source: HighWire-hosted journal article supplement (https://bmjopen.bmj.com/content/7/8/e017001)
Supplement: inline-supplementary-material-2 [file inline-supplementary-material-2.pdf]

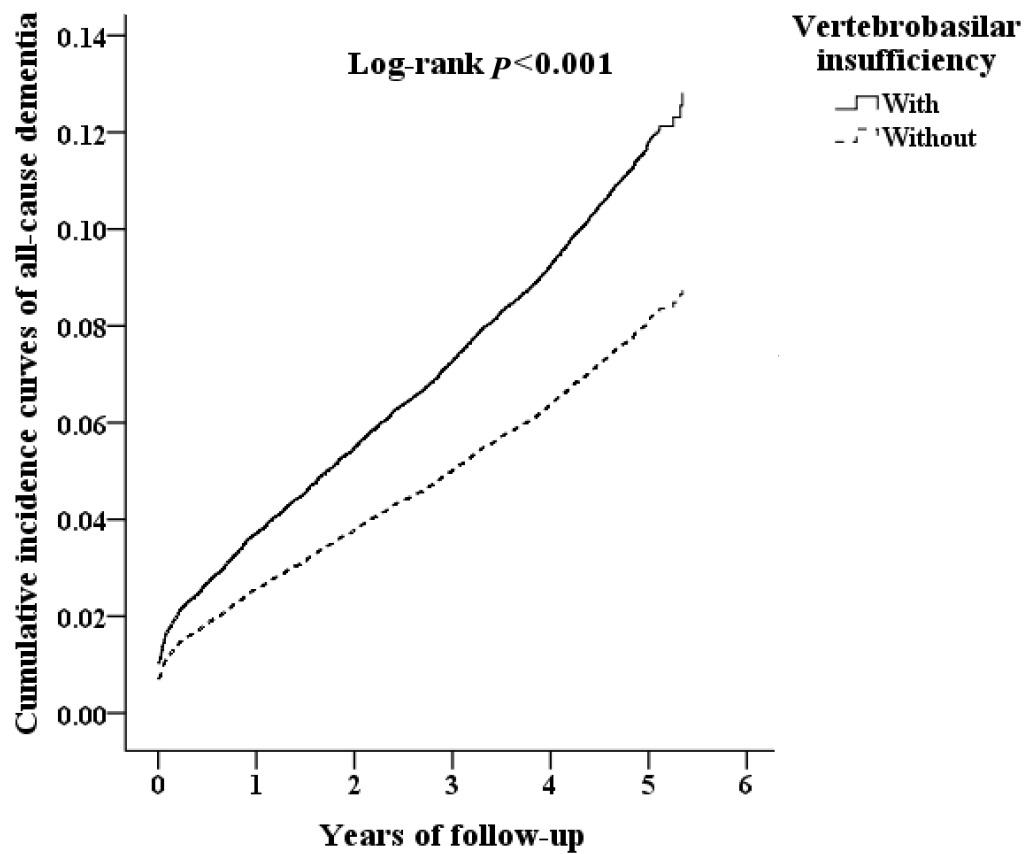

**Supplementary Figure S1.** The cumulative incidence curves of all-cause dementia for individuals with and without vertebrobasilar insufficiency (adjusted hazard ratios of death).
